# Supplementary material for: Meta-Analysis and Systematic Review of Phenotypic and Genotypic Antimicrobial Resistance and Virulence Factors in Vibrio parahaemolyticus Isolated from Shrimp
Source: MDPI journal article supplement (doi:10.3390/antibiotics13040370), 2024-04-17
Supplement: s1 [file s1]

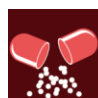Table S1: Completed PRISMA 2020 checklist<sup>1</sup>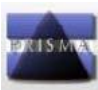

## PRISMA 2020 Checklist

| Section and Topic             | Item # | Checklist item                                                                                                                                                                                                                                                                                       | Location where item is reported |
|-------------------------------|--------|------------------------------------------------------------------------------------------------------------------------------------------------------------------------------------------------------------------------------------------------------------------------------------------------------|---------------------------------|
| <b>TITLE</b>                  |        |                                                                                                                                                                                                                                                                                                      |                                 |
| Title                         | 1      | Identify the report as a systematic review.                                                                                                                                                                                                                                                          | 1                               |
| <b>ABSTRACT</b>               |        |                                                                                                                                                                                                                                                                                                      |                                 |
| Abstract                      | 2      | See the PRISMA 2020 for Abstracts checklist.                                                                                                                                                                                                                                                         | 1                               |
| <b>INTRODUCTION</b>           |        |                                                                                                                                                                                                                                                                                                      |                                 |
| Rationale                     | 3      | Describe the rationale for the review in the context of existing knowledge.                                                                                                                                                                                                                          | 1                               |
| Objectives                    | 4      | Provide an explicit statement of the objective(s) or question(s) the review addresses.                                                                                                                                                                                                               | 2                               |
| <b>METHODS</b>                |        |                                                                                                                                                                                                                                                                                                      |                                 |
| Eligibility criteria          | 5      | Specify the inclusion and exclusion criteria for the review and how studies were grouped for the syntheses.                                                                                                                                                                                          | 13-14                           |
| Information sources           | 6      | Specify all databases, registers, websites, organisations, reference lists and other sources searched or consulted to identify studies. Specify the date when each source was last searched or consulted.                                                                                            | 14                              |
| Search strategy               | 7      | Present the full search strategies for all databases, registers and websites, including any filters and limits used.                                                                                                                                                                                 | 14, Table S3                    |
| Selection process             | 8      | Specify the methods used to decide whether a study met the inclusion criteria of the review, including how many reviewers screened each record and each report retrieved, whether they worked independently, and if applicable, details of automation tools used in the process.                     | 14                              |
| Data collection process       | 9      | Specify the methods used to collect data from reports, including how many reviewers collected data from each report, whether they worked independently, any processes for obtaining or confirming data from study investigators, and if applicable, details of automation tools used in the process. | 14                              |
| Data items                    | 10a    | List and define all outcomes for which data were sought. Specify whether all results that were compatible with each outcome domain in each study were sought (e.g. for all measures, time points, analyses), and if not, the methods used to decide which results to collect.                        | 14-15                           |
|                               | 10b    | List and define all other variables for which data were sought (e.g. participant and intervention characteristics, funding sources). Describe any assumptions made about any missing or unclear information.                                                                                         | 14-15                           |
| Study risk of bias assessment | 11     | Specify the methods used to assess risk of bias in the included studies, including details of the tool(s) used, how many reviewers assessed each study and whether they worked independently, and if applicable, details of automation tools used in the process.                                    | 15                              |
| Effect measures               | 12     | Specify for each outcome the effect measure(s) (e.g. risk ratio, mean difference) used in the synthesis or presentation of results.                                                                                                                                                                  | NA                              |
| Synthesis methods             | 13a    | Describe the processes used to decide which studies were eligible for each synthesis (e.g. tabulating the study intervention characteristics and comparing against the planned groups for each synthesis (item #5)).                                                                                 | 13-14                           |
|                               | 13b    | Describe any methods required to prepare the data for presentation or                                                                                                                                                                                                                                | 14                              |

| Section and Topic             | Item # | Checklist item                                                                                                                                                                                                                                                                       | Location where item is reported |
|-------------------------------|--------|--------------------------------------------------------------------------------------------------------------------------------------------------------------------------------------------------------------------------------------------------------------------------------------|---------------------------------|
|                               |        | synthesis, such as handling of missing summary statistics, or data conversions.                                                                                                                                                                                                      |                                 |
|                               | 13c    | Describe any methods used to tabulate or visually display results of individual studies and syntheses.                                                                                                                                                                               | 15                              |
|                               | 13d    | Describe any methods used to synthesize results and provide a rationale for the choice(s). If meta-analysis was performed, describe the model(s), method(s) to identify the presence and extent of statistical heterogeneity, and software package(s) used.                          | 15                              |
|                               | 13e    | Describe any methods used to explore possible causes of heterogeneity among study results (e.g. subgroup analysis, meta-regression).                                                                                                                                                 | 15                              |
|                               | 13f    | Describe any sensitivity analyses conducted to assess robustness of the synthesized results.                                                                                                                                                                                         | 15                              |
| Reporting bias assessment     | 14     | Describe any methods used to assess risk of bias due to missing results in a synthesis (arising from reporting biases).                                                                                                                                                              | 15                              |
| Certainty assessment          | 15     | Describe any methods used to assess certainty (or confidence) in the body of evidence for an outcome.                                                                                                                                                                                | 15                              |
| <b>RESULTS</b>                |        |                                                                                                                                                                                                                                                                                      |                                 |
| Study selection               | 16a    | Describe the results of the search and selection process, from the number of records identified in the search to the number of studies included in the review, ideally using a flow diagram.                                                                                         | 2-3, Figure 1                   |
|                               | 16b    | Cite studies that might appear to meet the inclusion criteria, but which were excluded, and explain why they were excluded.                                                                                                                                                          | 2-3                             |
| Study characteristics         | 17     | Cite each included study and present its characteristics.                                                                                                                                                                                                                            | 3-4                             |
| Risk of bias in studies       | 18     | Present assessments of risk of bias for each included study.                                                                                                                                                                                                                         | Figure 2C, 2D, S1 & S2          |
| Results of individual studies | 19     | For all outcomes, present, for each study: (a) summary statistics for each group (where appropriate) and (b) an effect estimate and its precision (e.g. confidence/credible interval), ideally using structured tables or plots.                                                     | 3-6 & Table 2                   |
| Results of syntheses          | 20a    | For each synthesis, briefly summarise the characteristics and risk of bias among contributing studies.                                                                                                                                                                               | 9, Figure 2C, 2D, S1 & S2       |
|                               | 20b    | Present results of all statistical syntheses conducted. If meta-analysis was done, present for each the summary estimate and its precision (e.g. confidence/credible interval) and measures of statistical heterogeneity. If comparing groups, describe the direction of the effect. | 4-8 & Figure 2                  |
|                               | 20c    | Present results of all investigations of possible causes of heterogeneity among study results.                                                                                                                                                                                       | Figure 2                        |
|                               | 20d    | Present results of all sensitivity analyses conducted to assess the robustness of the synthesized results.                                                                                                                                                                           | Table 1                         |
| Reporting biases              | 21     | Present assessments of risk of bias due to missing results (arising from reporting biases) for each synthesis assessed.                                                                                                                                                              | Figure S1                       |
| Certainty of evidence         | 22     | Present assessments of certainty (or confidence) in the body of evidence for each outcome assessed.                                                                                                                                                                                  | Table 2 & Figure 2              |
| <b>DISCUSSION</b>             |        |                                                                                                                                                                                                                                                                                      |                                 |

| Section and Topic                              | Item # | Checklist item                                                                                                                                                                                                                             | Location where item is reported |
|------------------------------------------------|--------|--------------------------------------------------------------------------------------------------------------------------------------------------------------------------------------------------------------------------------------------|---------------------------------|
| Discussion                                     | 23a    | Provide a general interpretation of the results in the context of other evidence.                                                                                                                                                          | 11-12                           |
|                                                | 23b    | Discuss any limitations of the evidence included in the review.                                                                                                                                                                            | 13                              |
|                                                | 23c    | Discuss any limitations of the review processes used.                                                                                                                                                                                      | 13                              |
|                                                | 23d    | Discuss implications of the results for practice, policy, and future research.                                                                                                                                                             | 13                              |
| <b>OTHER INFORMATION</b>                       |        |                                                                                                                                                                                                                                            |                                 |
| Registration and protocol                      | 24a    | Provide registration information for the review, including register name and registration number, or state that the review was not registered.                                                                                             | 13                              |
|                                                | 24b    | Indicate where the review protocol can be accessed, or state that a protocol was not prepared.                                                                                                                                             | 13                              |
|                                                | 24c    | Describe and explain any amendments to information provided at registration or in the protocol.                                                                                                                                            | 13-14                           |
| Support                                        | 25     | Describe sources of financial or non-financial support for the review, and the role of the funders or sponsors in the review.                                                                                                              | 16                              |
| Competing interests                            | 26     | Declare any competing interests of review authors.                                                                                                                                                                                         | 16                              |
| Availability of data, code and other materials | 27     | Report which of the following are publicly available and where they can be found: template data collection forms; data extracted from included studies; data used for all analyses; analytic code; any other materials used in the review. | 16                              |

<sup>1</sup> The PRISMA checklist was retrieved from Page et al.,2021.

For more information, visit: <http://www.prisma-statement.org/>

**Table S2:** Search algorithms and example of key terms used for identification of relevant publications in *V. parahaemolyticus*

| Search algorithm                                    | Example                                                                                                                                                                                                                                                                                                                                                                               |
|-----------------------------------------------------|---------------------------------------------------------------------------------------------------------------------------------------------------------------------------------------------------------------------------------------------------------------------------------------------------------------------------------------------------------------------------------------|
| Bacteria                                            | <i>Vibrio parahaemolyticus</i> ; <i>V. parahaemolyticus</i>                                                                                                                                                                                                                                                                                                                           |
| Target animal                                       | Shrimp                                                                                                                                                                                                                                                                                                                                                                                |
| Antimicrobial resistance                            | Antimicrobial resistance; AMR; antibiotic resistance; antimicrobial susceptibility test; resistance profile                                                                                                                                                                                                                                                                           |
| Virulence factor                                    | Virulence, TDH, TRH, pathogenicity                                                                                                                                                                                                                                                                                                                                                    |
| Bacteria * target animal                            | <i>Vibrio parahaemolyticus</i> ( <i>V. parahaemolyticus</i> ) * shrimp                                                                                                                                                                                                                                                                                                                |
| Bacteria * virulence factor                         | <i>V. parahaemolyticus</i> * virulence; <i>V. parahaemolyticus</i> * TDH; <i>V. parahaemolyticus</i> * TRH; <i>V. parahaemolyticus</i> * pathogenicity                                                                                                                                                                                                                                |
| Bacteria * target animal * antimicrobial resistance | <i>V. parahaemolyticus</i> * shrimp * antimicrobial resistance; <i>V. parahaemolyticus</i> * shrimp * AMR; <i>V. parahaemolyticus</i> * shrimp * antibiotic resistance; <i>V. parahaemolyticus</i> * shrimp * antimicrobial susceptibility test; <i>V. parahaemolyticus</i> * shrimp * antimicrobial susceptibility testing; <i>V. parahaemolyticus</i> * shrimp * resistance profile |

**Table S3:** AMR and their determinants of *V. parahaemolyticus* isolated from shrimp among relevant studies (n = 32)

| ID | Author and published year | Country   | AST                                                                         | Antimicrobial class                                                                                                                                      | Antimicrobial                                                                                                                                       | Prevalence (%)                                                            |
|----|---------------------------|-----------|-----------------------------------------------------------------------------|----------------------------------------------------------------------------------------------------------------------------------------------------------|-----------------------------------------------------------------------------------------------------------------------------------------------------|---------------------------------------------------------------------------|
| 1  | Mulya et al. (2022)       | Indonesia | Disc diffusion (CLSI 2016)                                                  | Beta-lactams<br>Phenicol<br>Quinolones<br>Tetracyclines                                                                                                  | Ampicillin<br>Chloramphenicol<br>Ciprofloxacin<br>Enrofloxacin<br>Tetracycline                                                                      | 100.0<br>0<br>0<br>0<br>41.7                                              |
| 2  | Dang et al. (2022)        | Vietnam   | Disc diffusion (CLSI M100-S24, CLSI, 2014) and broth macro dilution (NCCLS) | Aminoglycosides<br><br>Beta-lactams<br>Cephalosporins<br>Folate pathway inhibitor/sulfonamides<br>Macrolides<br>Tetracyclines                            | Gentamicin<br>Kanamycin<br>Neomycin<br>Amoxicillin<br>Cephalexin<br>Sulfadiazine<br><br>Erythromycin<br>Doxycycline<br>Oxytetracycline              | 46.6<br>34.5<br>39.7<br>100.0<br>100.0<br>94.8<br><br>88.0<br>3.5<br>36.2 |
| 3  | Nadella et al. (2022)     | India     | Disc diffusion (CLSI, 2020)                                                 | Folate pathway inhibitor/sulfonamides<br>Macrolides<br>Phenicol<br>Quinolones<br>Tetracyclines                                                           | Tri-sulfa<br><br>Erythromycin<br>Chloramphenicol<br>Ciprofloxacin<br>Oxytetracycline                                                                | 75.0<br><br>70.0<br>40.0<br>70.0<br>95.0                                  |
| 4  | Babu et al. (2021)        | India     | Disc diffusion                                                              | NA                                                                                                                                                       | NA                                                                                                                                                  | NA                                                                        |
| 5  | Vu et al. (2022)          | Vietnam   | Disc diffusion (CLSI, 2015)                                                 | Aminoglycosides<br>Beta-lactams<br>Carbapenems<br>Cephalosporins<br><br>Folate pathway inhibitor/sulfonamides<br>Phenicol<br>Quinolones<br>Tetracyclines | Gentamicin<br>Ampicillin<br>Imipenem<br>Cefotaxime<br>Cefoxitin<br>Ceftazidime<br>Tri-sulfa<br><br>Chloramphenicol<br>Ciprofloxacin<br>Tetracycline | 0<br>80.8<br>0<br>11.5<br>0<br>11.5<br>7.7<br><br>0<br>0<br>3.9           |

|   |                             |          |                                                             |                                                                                                                                                                                                     |                                                                                                                                                                                                                                                        |                                                                                                                            |
|---|-----------------------------|----------|-------------------------------------------------------------|-----------------------------------------------------------------------------------------------------------------------------------------------------------------------------------------------------|--------------------------------------------------------------------------------------------------------------------------------------------------------------------------------------------------------------------------------------------------------|----------------------------------------------------------------------------------------------------------------------------|
| 6 | Haifa-Haryani et al. (2022) | Malaysia | Disc Diffusion (CLSI, M45-A2)                               | Aminoglycosides<br><br>Beta-lactams<br><br>Cephalosporins<br><br>Folate pathway inhibitor/sulfonamides<br>Glycopeptides<br>Macrolides<br>Nitrofurans<br>Phenicol<br>Quinolones<br><br>Tetracyclines | Gentamicin<br>Kanamycin<br>Ampicillin<br>Penicillin<br>Cefepime<br>Cefotaxime<br>Ceftazidime<br>Cephalothin<br>Sulfamethoxazole<br><br>Vancomycin<br>Erythromycin<br>Nitrofurantoin<br>Chloramphenicol<br>Ciprofloxacin<br>Norfloxacin<br>Tetracycline | 7.3<br>40.3<br>84.7<br>96.8<br>1.6<br>73.4<br>24.2<br>86.3<br>13.7<br><br>96.8<br>19.4<br>53.2<br>8.9<br>5.7<br>0.8<br>0.8 |
| 7 | Kim et al. (2021)           | Korea    | Broth micro dilution Sensititre® (CLSI, 2016; EUCAST, 2019) | Aminoglycosides<br><br>Beta-lactams<br>Carbapenems<br>Cephalosporins<br><br>Folate pathway inhibitor/sulfonamides<br>Macrolides<br>Phenicol<br>Polymyxins<br>Quinolones<br><br>Tetracyclines        | Amikacin<br>Gentamicin<br>Streptomycin<br>Ampicillin<br>Imipenem<br>Cefotaxime<br>Cefoxitin<br>Ceftazidime<br>Ceftriaxone<br>Tri-sulfa<br><br>Azithromycin<br>Chloramphenicol<br>Colistin<br>Ciprofloxacin<br>Nalidixic acid<br>Tetracycline           | 4.2<br>0<br>91.7<br>100.0<br>0<br>0<br>0<br>4.2<br>2.1<br>6.3<br><br>0<br>0<br>100.0<br>0<br>0<br>6.3                      |
| 8 | Mok et al. (2021)           | Korea    | Broth micro dilution Sensititre®                            | Aminoglycosides<br><br>Beta-lactams<br><br>Carbapenems<br>Cephalosporins<br><br>Folate pathway inhibitor/sulfonamides<br>Phenicol<br>Polymyxins<br>Quinolones<br><br>Tetracyclines                  | Gentamicin<br>Streptomycin<br>Amox/clo<br>Ampicillin<br>Meropenem<br>Cefepime<br>Cefoxitin<br>Ceftazidime<br>Ceftiofur<br>Tri-sulfa<br><br>Chloramphenicol<br>Colistin<br>Ciprofloxacin<br>Nalidixic acid<br>Tetracycline                              | 0<br>3.4<br>2.3<br>11.2<br>0<br>0<br>0<br>0<br>0<br>0<br><br>0<br>82.0<br>0<br>0<br>0                                      |

|    |                                 |            |                                      |                                                                                                                                                                  |                                                                                                                                                                                                                          |                                                                                                |
|----|---------------------------------|------------|--------------------------------------|------------------------------------------------------------------------------------------------------------------------------------------------------------------|--------------------------------------------------------------------------------------------------------------------------------------------------------------------------------------------------------------------------|------------------------------------------------------------------------------------------------|
| 9  | Jin et al. (2021)               | China      | Broth micro-dilution (CLSI, 2019)    | Aminoglycosides<br>Beta-lactams<br><br>Cephalosporins<br><br>Phenicol<br>Quinolones                                                                              | Kanamycin<br>Amox/clo<br>Ampicillin<br>Cefazolin<br>Cefuroxime<br>Chloramphenicol<br>Ciprofloxacin<br>Nalidixic acid<br>Norfloxacin                                                                                      | 1.4<br>91.9<br>94.6<br>1.4<br>6.8<br>98.7<br>2.7<br>4.1<br>0                                   |
| 10 | Siddique et al. (2021)          | Bangladesh | Broth micro-dilution (CLSI, 2019)    | Aminoglycosides<br><br>Beta-lactams<br><br>Carbapenems<br><br>Cephalosporins<br><br><br>Folate pathway inhibitor/sulfonamides<br>Quinolones<br><br>Tetracyclines | Gentamicin<br>Streptomycin<br>Amoxicillin<br>Ampicillin<br>Piper/tazo<br>Imipenem<br>Meropenem<br>Cefixime<br>Cefotaxime<br>Cefoxitin<br>Ceftriaxone<br>Tri-sulfa<br><br>Ciprofloxacin<br>Nalidixic acid<br>Tetracycline | 11.8<br>5.9<br>94.1<br>94.1<br>0<br>0<br>0<br>0<br>29.4<br>0<br>17.7<br>0<br><br>0<br>0<br>0   |
| 11 | Álvarez-Contreras et al. (2021) | Mexico     | Micro dilution (CLSI, 2012; EP17-A2) | Aminoglycosides<br><br>Beta-lactams<br><br>Cephalosporins<br><br><br>Folate pathway inhibitor/sulfonamides<br>Nitrofurans<br>Phenicol<br>Quinolones              | Amikacin<br>Gentamicin<br>Netilmicin<br>Ampicillin<br>Carbenicillin<br>Cefotaxime<br>Cephalothin<br>Ceftriaxone<br>Tri-sulfa<br><br>Nitrofurantoin<br>Chloramphenicol<br>Pefloxacin                                      | 41.3<br>21.7<br>52.2<br>100.0<br>28.3<br>78.3<br>100.0<br>13.0<br>8.7<br><br>21.7<br>0<br>10.9 |
| 12 | Janecko et al. (2021)           | UK         | NA                                   | NA                                                                                                                                                               | NA                                                                                                                                                                                                                       | NA                                                                                             |
| 13 | Vengadasamy et al. (2021)       | Malaysia   | Disk diffusion (CLSI, 2016)          | Aminoglycosides<br><br>Beta-lactams<br><br>Carbapenems<br>Cephalosporins<br><br>Folate pathway inhibitor/sulfonamides<br>Phenicol                                | Amikacin<br>Gentamicin<br>Kanamycin<br>Ampicillin<br>Ampi/sul<br>Imipenem<br>Cefotaxime<br>Ceftazidime<br>Tri-sulfa<br><br>Chloramphenicol                                                                               | 2.3<br>4.7<br>9.3<br>95.4<br>81.4<br>23.3<br>37.2<br>7.0<br>0<br><br>0                         |

|    |                            |            |                                    |                                       |                 |       |
|----|----------------------------|------------|------------------------------------|---------------------------------------|-----------------|-------|
|    |                            |            |                                    | Quinolones                            | Levofloxacin    | 2.3   |
|    |                            |            |                                    |                                       | Nalidixic acid  | 2.3   |
|    |                            |            |                                    | Tetracyclines                         | Oxytetracycline | 16.3  |
|    |                            |            |                                    |                                       | Tetracycline    | 18.6  |
| 14 | Yasin et al.<br>(2021)     | Bangladesh | Disk diffusion (CLSI, 2013)        | Aminoglycosides                       | Gentamicin      | 100.0 |
|    |                            |            |                                    | Beta-lactams                          | Ampicillin      | 0     |
|    |                            |            |                                    |                                       | Penicillin      | 100.0 |
|    |                            |            |                                    | Cephalosporins                        | Ceftazidime     | 0     |
|    |                            |            |                                    |                                       | Ceftriaxone     | 0     |
|    |                            |            |                                    | Folate pathway inhibitor/sulfonamides | Trimethoprim    | 0     |
|    |                            |            |                                    |                                       | Tri-sulfa       | 100.0 |
|    |                            |            |                                    | Macrolides                            | Azithromycin    | 0     |
|    |                            |            |                                    |                                       | Erythromycin    | 0     |
|    |                            |            |                                    | Phenicols                             | Chloramphenicol | 0     |
|    |                            |            |                                    | Quinolones                            | Ciprofloxacin   | 0     |
|    |                            |            |                                    | Tetracyclines                         | Tetracycline    | 100.0 |
| 15 | Nguyen et al.<br>(2020)    | Vietnam    | Disk-diffusion method (CLSI, 2018) | Aminoglycosides                       | Amikacin        | 1.6   |
|    |                            |            |                                    |                                       | Gentamicin      | 0     |
|    |                            |            |                                    | Beta-lactams                          | Amox/cla        | 9.4   |
|    |                            |            |                                    | Carbapenems                           | Ampicillin      | 100.0 |
|    |                            |            |                                    | Cephalosporins                        | Imipenem        | 3.1   |
|    |                            |            |                                    |                                       | Cefotaxime      | 31.3  |
|    |                            |            |                                    | Folate pathway inhibitor/sulfonamides | Ceftazidime     | 15.6  |
|    |                            |            |                                    |                                       | Tri-sulfa       | 26.6  |
|    |                            |            |                                    | Phenicols                             | Chloramphenicol | 1.6   |
|    |                            |            |                                    | Quinolones                            | Ciprofloxacin   | 11.0  |
|    |                            |            |                                    |                                       | Ofloxacin       | 9.4   |
|    |                            |            |                                    | Tetracyclines                         | Tetracycline    | 10.9  |
| 16 | Navaneeth et al.<br>(2020) | India      | Disk-diffusion method              | Aminoglycosides                       | Amikacin        | 0     |
|    |                            |            |                                    |                                       | Gentamicin      | 0     |
|    |                            |            |                                    | Beta-lactams                          | Amox/clav       | 40.0  |
|    |                            |            |                                    |                                       | Amp/sul         | 2.9   |
|    |                            |            |                                    |                                       | Ticarcillin     | 4.8   |
|    |                            |            |                                    | Carbapenems                           | Meropenem       | 0     |
|    |                            |            |                                    | Cephalosporins                        | Cefotaxime      | 9.5   |
|    |                            |            |                                    |                                       | Cephalothin     | 0     |
|    |                            |            |                                    | Phenicols                             | Chloramphenicol | 1.9   |
|    |                            |            |                                    | Quinolones                            | Ciprofloxacin   | 1.9   |
|    |                            |            |                                    |                                       | Levofloxacin    | 1.9   |
|    |                            |            |                                    |                                       | Nalidixic acid  | 0     |
|    |                            |            |                                    |                                       | Norfloxacin     | 0     |
|    |                            |            |                                    |                                       | Ofloxacin       | 2.9   |
|    |                            |            |                                    | Tetracyclines                         | Minocycline     | 1.9   |
|    |                            |            |                                    |                                       | Tetracycline    | 100.0 |
| 17 | Jiang et al.<br>(2020)     | China      | Disk-diffusion method (CLSI, 2017) | Aminoglycosides                       | Streptomycin    | 74.4  |
|    |                            |            |                                    | Beta-lactams                          | Ampicillin      | 76.7  |
|    |                            |            |                                    | Carbapenems                           | Imipenem        | 0     |
|    |                            |            |                                    | Cephalosporins                        | Cefamandole     | 18.9  |
|    |                            |            |                                    |                                       | Cefazolin       | 25.6  |
|    |                            |            |                                    |                                       | Cefepime        | 3.33  |
|    |                            |            |                                    |                                       | Ceftizoxime     | 4.44  |



|    |                       |            |                                    |                                       |                  |      |
|----|-----------------------|------------|------------------------------------|---------------------------------------|------------------|------|
|    |                       |            |                                    | Folate pathway inhibitor/sulfonamides | Sulfisoxazole    | 47.8 |
|    |                       |            |                                    | Nitrofurans                           | Tri-sulfa        | 64.4 |
|    |                       |            |                                    | Phenicol                              | Nitrofurantoin   | 0    |
|    |                       |            |                                    |                                       | Chloramphenicol  | 57.8 |
|    |                       |            |                                    | Polymyxins                            | Florfenicol      | 53.3 |
|    |                       |            |                                    | Quinolones                            | Polymyxin B      | 0    |
|    |                       |            |                                    |                                       | Ciprofloxacin    | 0    |
|    |                       |            |                                    |                                       | Enrofloxacin     | 47.8 |
|    |                       |            |                                    |                                       | Norfloxacin      | 0    |
|    |                       |            |                                    | Tetracyclines                         | Doxycycline      | 46.7 |
|    |                       |            |                                    |                                       | Tetracycline     | 57.8 |
| 18 | Beshiru et al. (2020) | Nigeria    | Disk-diffusion method              | Aminoglycosides                       | Gentamicin       | 0    |
|    |                       |            |                                    |                                       | Kanamycin        | 4.4  |
|    |                       |            |                                    |                                       | Streptomycin     | 23.9 |
|    |                       |            |                                    |                                       | Tobramycin       | 0    |
|    |                       |            |                                    | Beta-lactams                          | Amoxicillin      | 82.6 |
|    |                       |            |                                    |                                       | Amox-clav        | 23.9 |
|    |                       |            |                                    |                                       | Ampicillin       | 6.5  |
|    |                       |            |                                    |                                       | Amp/sul          | 23.9 |
|    |                       |            |                                    |                                       | Penicillin       | 87.0 |
|    |                       |            |                                    | Carbapenems                           | Imipenem         | 13.0 |
|    |                       |            |                                    |                                       | Meropenem        | 17.4 |
|    |                       |            |                                    | Cephalosporins                        | Cefotaxime       | 30.4 |
|    |                       |            |                                    |                                       | Cephalothin      | 17.4 |
|    |                       |            |                                    | Folate-pathway inhibitor/sulfonamides | Sulfamethoxazole | 32.6 |
|    |                       |            |                                    |                                       | Trimethoprim     | 41.3 |
|    |                       |            |                                    | Macrolides                            | Erythromycin     | 15.2 |
|    |                       |            |                                    | Phenicol                              | Chloramphenicol  | 21.7 |
|    |                       |            |                                    | Polymyxins                            | Colistin         | 0    |
|    |                       |            |                                    |                                       | Polymyxin B      | 4.4  |
|    |                       |            |                                    |                                       | Ciprofloxacin    | 15.2 |
|    |                       |            |                                    | Quinolones                            | Ofloxacin        | 19.6 |
|    |                       |            |                                    |                                       | Doxycycline      | 41.3 |
|    |                       |            |                                    | Tetracyclines                         | Oxytetracycline  | 37.0 |
|    |                       |            |                                    |                                       | Tetracycline     | 28.3 |
| 19 | Rahman et al. (2020)  | Bangladesh | Disk-diffusion method              | Aminoglycosides                       | Gentamicin       | 0    |
|    |                       |            |                                    |                                       | Kanamycin        | 0    |
|    |                       |            |                                    | Beta-lactams                          | Amoxicillin      | 75.0 |
|    |                       |            |                                    |                                       | Ampicillin       | 56.3 |
|    |                       |            |                                    | Folate-pathway inhibitor/sulfonamides | Sulfamethoxazole | 0    |
|    |                       |            |                                    | Macrolides                            | Azithromycin     | 0    |
|    |                       |            |                                    |                                       | Erythromycin     | 6.3  |
|    |                       |            |                                    | Nitrofurans                           | Nitrofurantoin   | 0    |
|    |                       |            |                                    | Phenicol                              | Chloramphenicol  | 0    |
|    |                       |            |                                    | Polymyxins                            | Polymyxin B      | 31.3 |
|    |                       |            |                                    | Quinolones                            | Ciprofloxacin    | 0    |
|    |                       |            |                                    | Tetracyclines                         | Tetracycline     | 0    |
| 20 | Li et al. (2020)      | China      | Disk-diffusion method (CLSI, 2018) | Aminoglycosides                       | Gentamicin       | 20.8 |
|    |                       |            |                                    |                                       | Kanamycin        | 44.6 |
|    |                       |            |                                    |                                       | Streptomycin     | 65.8 |

|    |                            |       |                                    |                                       |                    |      |
|----|----------------------------|-------|------------------------------------|---------------------------------------|--------------------|------|
|    |                            |       |                                    | Beta-lactams                          | Ampicillin         | 79.2 |
|    |                            |       |                                    | Cephalosporins                        | Cefazolin          | 58.9 |
|    |                            |       |                                    |                                       | Cephalothin        | 74.8 |
|    |                            |       |                                    | Folate-pathway inhibitor/sulfonamides | Tri-sulfa          | 10.4 |
|    |                            |       |                                    | Macrolides                            | Azithromycin       | 12.9 |
|    |                            |       |                                    | Phenicol                              | Chloramphenicol    | 4.0  |
|    |                            |       |                                    | Quinolones                            | Ciprofloxacin      | 3.5  |
|    |                            |       |                                    |                                       | Nalidixic acid     | 2.5  |
|    |                            |       |                                    | Tetracyclines                         | Tetracycline       | 14.4 |
| 21 | Zangoei-Fard et al. (2020) | Iran  | Disk-diffusion method (CLSI, 2010) | Aminoglycosides                       | Gentamicin         | 68.4 |
|    |                            |       |                                    |                                       | Streptomycin       | 42.1 |
|    |                            |       |                                    |                                       | Vancomycin         | 36.8 |
|    |                            |       |                                    | Beta-lactams                          | Ampicillin         | 57.9 |
|    |                            |       |                                    |                                       | Penicillin         | 47.4 |
|    |                            |       |                                    | Cephalosporins                        | Cefotaxime         | 31.6 |
|    |                            |       |                                    |                                       | Cephalothin        | 36.8 |
|    |                            |       |                                    | Folate-pathway inhibitor/sulfonamides | Tri-sulfa          | 36.8 |
|    |                            |       |                                    | Macrolides                            | Azithromycin       | 26.3 |
|    |                            |       |                                    |                                       | Erythromycin       | 47.4 |
|    |                            |       |                                    | Quinolones                            | Ciprofloxacin      | 21.1 |
|    |                            |       |                                    |                                       | Nalidixic acid     | 21.1 |
|    |                            |       |                                    | Tetracyclines                         | Tetracycline       | 52.6 |
| 22 | Hu et al. (2020)           | China | Disk-diffusion method (CLSI, 2015) | Aminoglycosides                       | Amikacin           | 0    |
|    |                            |       |                                    |                                       | Gentamicin         | 4.8  |
|    |                            |       |                                    |                                       | Kanamycin          | 0    |
|    |                            |       |                                    |                                       | Neomycin           | 0    |
|    |                            |       |                                    | Beta-lactams                          | Ampicillin         | 66.1 |
|    |                            |       |                                    |                                       | Carboxybenzicillin | 0    |
|    |                            |       |                                    |                                       | Oxacillin          | 71.0 |
|    |                            |       |                                    |                                       | Penicillin         | 77.4 |
|    |                            |       |                                    |                                       | Piperacillin       | 0    |
|    |                            |       |                                    | Cephalosporins                        | Cefazolin          | 0    |
|    |                            |       |                                    |                                       | Cefoperazone       | 0    |
|    |                            |       |                                    |                                       | Cefradine          | 17.7 |
|    |                            |       |                                    |                                       | Ceftazidime        | 0    |
|    |                            |       |                                    |                                       | Ceftriaxone        | 0    |
|    |                            |       |                                    |                                       | Cefuroxime         | 19.4 |
|    |                            |       |                                    |                                       | Cephalexin         | 17.7 |
|    |                            |       |                                    | Folate-pathway inhibitor/sulfonamides | Tri-sulfa          | 6.5  |
|    |                            |       |                                    | Glycopeptides                         | Vancomycin         | 59.7 |
|    |                            |       |                                    | Lincosamide                           | Clindamycin        | 8.1  |
|    |                            |       |                                    | Macrolides                            | Erythromycin       | 0    |
|    |                            |       |                                    |                                       | Medemycin          | 0    |
|    |                            |       |                                    | Oxazolidinones                        | Furazolidone       | 0    |
|    |                            |       |                                    | Phenicol                              | Chloramphenicol    | 11.3 |
|    |                            |       |                                    | Polymyxins                            | Polymyxin          | 0    |
|    |                            |       |                                    | Quinolones                            | Ciprofloxacin      | 0    |
|    |                            |       |                                    |                                       | Norfloxacin        | 0    |

|    |                       |          |                                    |                                                                                                                                                                                   |                                                                                                                                                                                                                                                                                                                                                   |                                                                                                                                                                         |
|----|-----------------------|----------|------------------------------------|-----------------------------------------------------------------------------------------------------------------------------------------------------------------------------------|---------------------------------------------------------------------------------------------------------------------------------------------------------------------------------------------------------------------------------------------------------------------------------------------------------------------------------------------------|-------------------------------------------------------------------------------------------------------------------------------------------------------------------------|
|    |                       |          |                                    | Tetracyclines                                                                                                                                                                     | Ofloxacin<br>Doxycycline<br>Minocycline<br>Tetracycline                                                                                                                                                                                                                                                                                           | 0<br>8.1<br>0<br>6.5                                                                                                                                                    |
| 23 | Lu et al. (2020)      | NA       | NA                                 | NA                                                                                                                                                                                | NA                                                                                                                                                                                                                                                                                                                                                | NA                                                                                                                                                                      |
| 24 | Bughe et al. (2020)   | Cameroon | Disk-diffusion method (CLSI, 2016) | Aminoglycosides<br><br>Beta-lactams<br>Cephalosporins<br>Phenicols<br>Quinolones                                                                                                  | Netilmicin<br>Streptomycin<br>Penicillin<br>Ceftazidime<br>Chloramphenicol<br>Ciprofloxacin<br>Norfloxacin                                                                                                                                                                                                                                        | 0<br>0<br>80.0<br>0<br>0<br>0<br>0                                                                                                                                      |
| 25 | Tan et al. (2020)     | Malaysia | Disk-diffusion method (CLSI, 2010) | Aminoglycosides<br><br>Beta-lactams<br><br><br>Carbapenems<br><br>Cephalosporins<br><br><br>Folate-pathway inhibitor/sulfonamides<br>Phenicols<br>Quinolones<br><br>Tetracyclines | Amikacin<br>Gentamicin<br>Amox/clo<br>Ampicillin<br>Amp/sul<br>Penicillin<br>Piperacillin<br>Piper/tazo<br>Imipenem<br>Meropenem<br>Cefazolin<br>Cefepime<br>Cefotaxime<br>Cefoxitin<br>Ceftazidime<br>Cefuroxime<br>Cephalothin<br>Tri-sulfa<br><br>Chloramphenicol<br>Ciprofloxacin<br>Levofloxacin<br>Ofloxacin<br>Doxycycline<br>Tetracycline | 37.5<br>6.7<br>0.8<br>84.2<br>0.8<br>100.0<br>35.8<br>15.8<br>0<br>0<br>84.2<br>3.3<br>5.0<br>12.5<br>5.0<br>51.7<br>54.2<br>0<br><br>0<br>13.3<br>1.7<br>2.5<br>0<br>0 |
| 26 | Hong et al. (2020)    | Vietnam  | Disk-diffusion method (CLSI, 2014) | Aminoglycosides<br><br>Beta-lactams<br>Carbapenems<br>Phenicols<br>Polymyxins<br>Quinolones<br><br>Tetracyclines                                                                  | Gentamicin<br>Kanamycin<br>Streptomycin<br>Ampicillin<br>Tebipenem<br>Chloramphenicol<br>Colistin<br>Nalidixic acid<br>Ofloxacin<br>Oxytetracycline                                                                                                                                                                                               | 0<br>0<br>91.7<br>91.7<br>0<br>0<br>91.7<br>8.3<br>0<br>25.0                                                                                                            |
| 27 | Tengfei et al. (2020) | China    | Disc diffusion method (CLSI, 2018) | Aminoglycosides<br><br>Beta-lactams                                                                                                                                               | Gentamicin<br>Kanamycin<br>Streptomycin<br>Ampicillin                                                                                                                                                                                                                                                                                             | 4.0<br>50.5<br>91.1<br>58.4                                                                                                                                             |

|    |                            |            |                                    |                                                                                                                                                               |                                                                                                                                                                                                 |                                                                                      |
|----|----------------------------|------------|------------------------------------|---------------------------------------------------------------------------------------------------------------------------------------------------------------|-------------------------------------------------------------------------------------------------------------------------------------------------------------------------------------------------|--------------------------------------------------------------------------------------|
|    |                            |            |                                    | Cephalosporins<br>Macrolides<br><br>Quinolones<br><br>Tetracyclines                                                                                           | Piperacillin<br>Cephazolin<br>Azithromycin<br>Erythromycin<br>Ciprofloxacin<br>Nalidixic acid<br>Minocycline<br>Tetracycline                                                                    | 36.6<br>42.6<br>7.9<br>4.0<br>5.0<br>4.0<br>3.0<br>4.0                               |
| 28 | Lei et al. (2020)          | China      | Broth micro-dilution method        | Aminoglycosides<br>Beta-lactams<br>Cephalosporins<br><br>Phenicols<br>Quinolones<br><br>Tetracyclines                                                         | Gentamicin<br>Ampicillin<br>Cefotaxime<br>Ceftazidime<br>Chloramphenicol<br>Ciprofloxacin<br>Levofloxacin<br>Tetracycline                                                                       | 18.9<br>83.0<br>0<br>0<br>4.7<br>4.7<br>4.7<br>15.1                                  |
| 29 | Amin et al. (2020)         | Bangladesh | Disc diffusion method              | Aminoglycosides<br>Folate-pathway inhibitor/sulfonamides<br>Glycopeptides<br>Macrolides<br>Phenicols<br>Quinolones                                            | Streptomycin<br>Tri-sulfa<br><br>Novobiocin<br>Azithromycin<br>Chloramphenicol<br>Ciprofloxacin                                                                                                 | 0<br>42.4<br><br>24.2<br>30.3<br>0<br>0                                              |
| 30 | Narayanan et al. (2020)    | India      | Disc diffusion method              | Aminoglycosides<br>Beta-lactams<br><br>Carbapenems<br>Cephalosporins<br><br>Folate-pathway inhibitor/sulfonamides<br>Phenicols<br>Quinolones<br>Tetracyclines | Gentamicin<br>Amox/clo<br>Ampicillin<br>Meropenem<br>Cefepime<br>Cefotaxime<br>Cefoxitin<br>Ceftazidime<br>Tri-sulfa<br><br>Chloramphenicol<br>Ciprofloxacin<br>Tetracycline                    | 3.7<br>7.4<br>100.0<br>3.7<br>44.4<br>74.1<br>48.1<br>29.6<br>0<br><br>0<br>3.7<br>0 |
| 31 | Amatul-Samah et al. (2020) | Malaysia   | Disk-diffusion method (CLSI, 2015) | Aminoglycosides<br><br>Beta-lactams<br>Cephalosporins<br><br>Glycopeptides<br>Macrolides<br>Phenicols<br>Polymyxins<br>Quinolones<br>Tetracyclines            | Gentamicin<br>Kanamycin<br>Streptomycin<br>Ampicillin<br>Cefepime<br>Ceftriaxone<br>Cephalothin<br>Vancomycin<br>Erythromycin<br>Chloramphenicol<br>Bacitracin<br>Ciprofloxacin<br>Tetracycline | 0<br>0<br>0<br>50.0<br>0<br>0<br>0<br>100.0<br>0<br>0<br>100.0<br>0<br>0             |

|    |                  |       |                                    |                                                                                                  |                                                                                                                                                      |                                                                            |
|----|------------------|-------|------------------------------------|--------------------------------------------------------------------------------------------------|------------------------------------------------------------------------------------------------------------------------------------------------------|----------------------------------------------------------------------------|
| 32 | Su et al. (2020) | China | Disk-diffusion method (CLSI, 2012) | Aminocyclitol<br>Aminoglycosides                                                                 | Spectinomycin<br>Gentamicin<br>Kanamycin<br>Streptomycin<br>Ampicillin<br>Trimethoprim<br>Tri-sulfa<br>Chloramphenicol<br>Rifampicin<br>Tetracycline | 44.6<br>37.1<br>50.1<br>75.4<br>93.0<br>44.0<br>5.0<br>0.5<br>82.9<br>24.1 |
|    |                  |       |                                    | Beta-lactams<br>Folate-pathway inhibitor/sulfonamides<br>Phenicol<br>Rifamycins<br>Tetracyclines |                                                                                                                                                      |                                                                            |

Amox/cla: Amoxicillin/clavulanic acid; Amp/sul: Ampicillin-sulbactam; Piper/tazo: Piperacillin-tazobactam; Tri-sulfa: Trimethoprim-sulfamethoxazole; NA: not available data

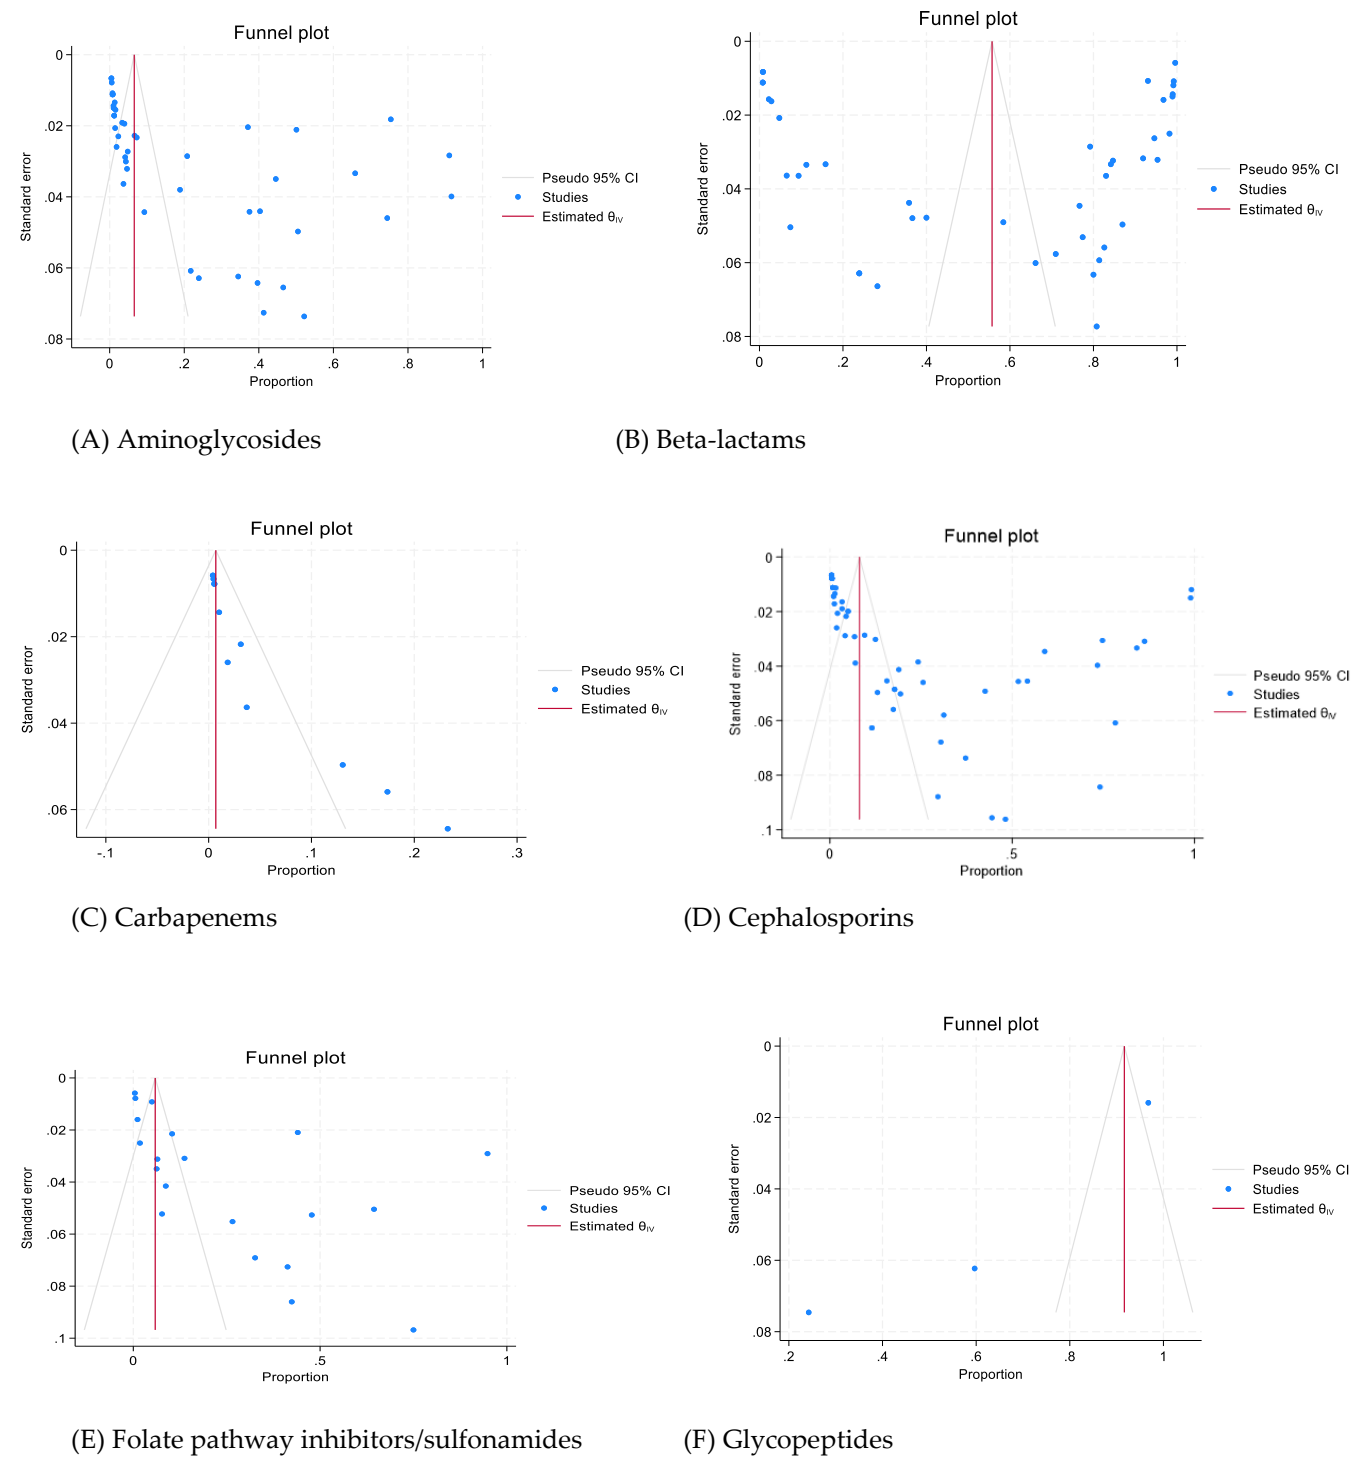

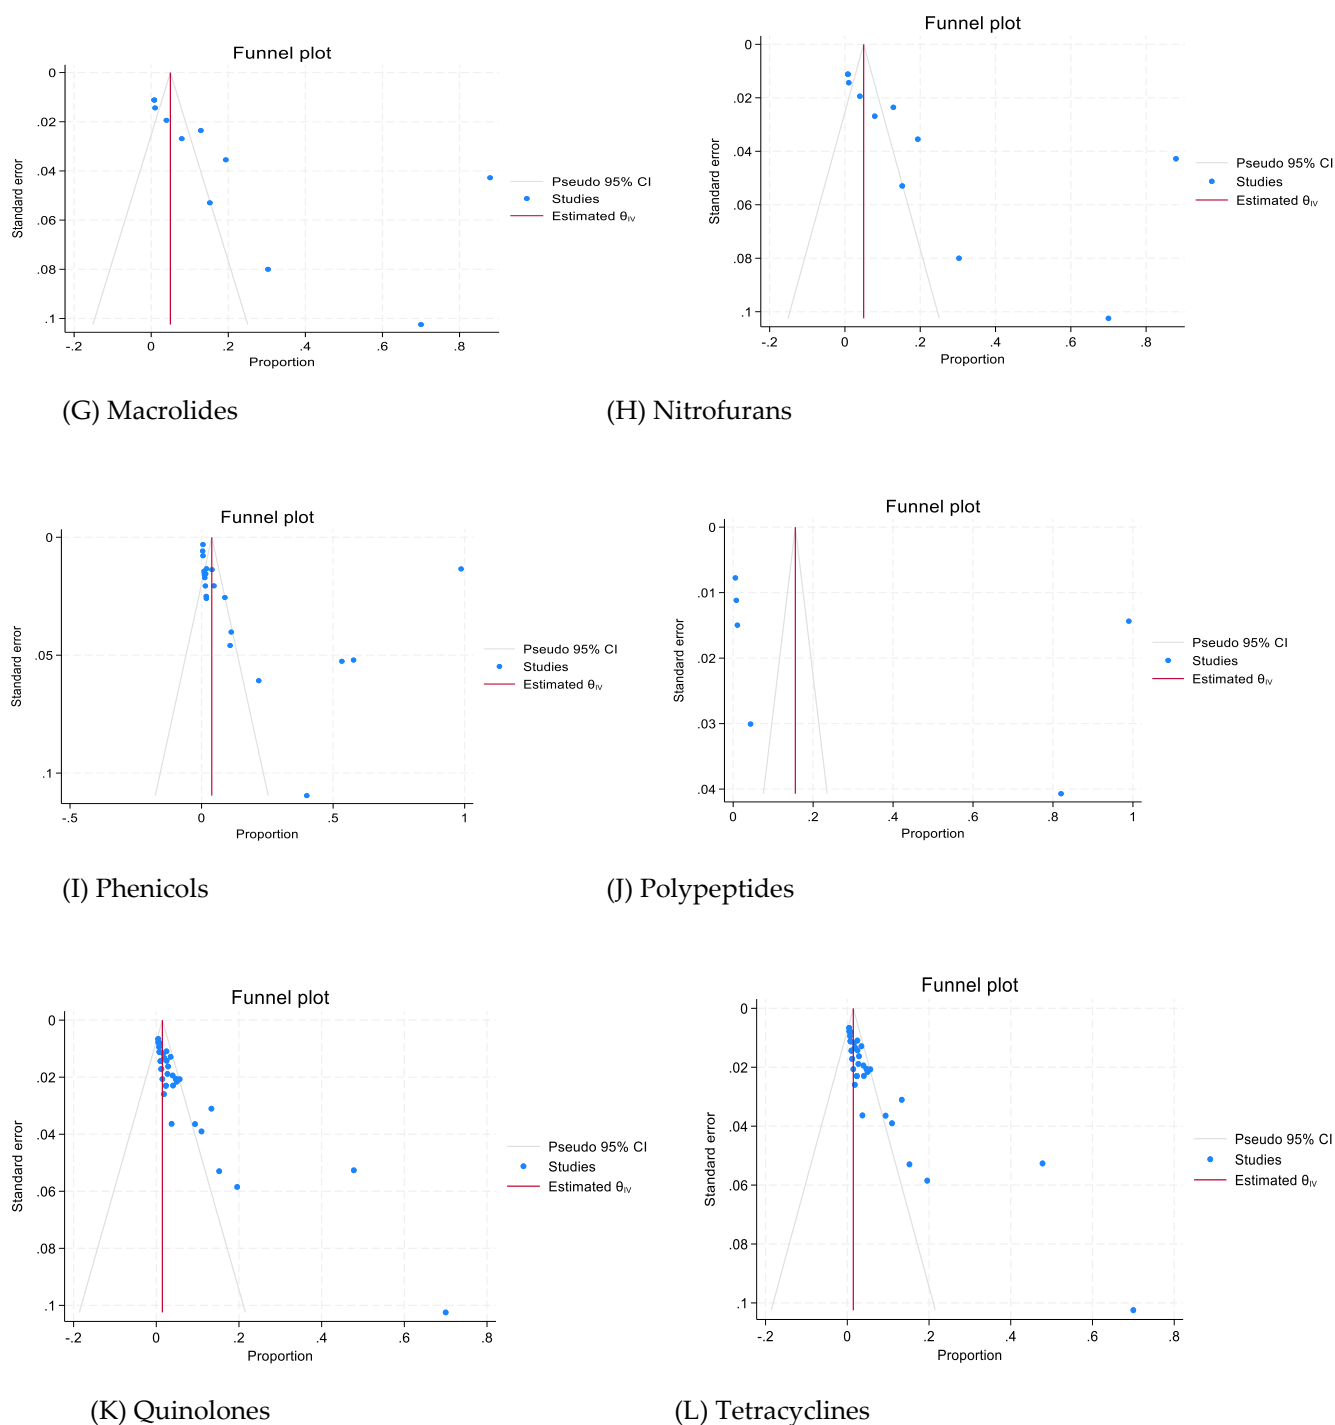

**Figure S1.** Funnel plots of prevalence of AMR in *V. parahaemolyticus* in shrimp to assess potential bias stratified by antimicrobial classes: (A) aminoglycosides; (B) beta-lactamases; (C) carbapenems; (D) cephalosporins; (E) folate pathway inhibitors/sulfonamides; (F) glycopeptides; (G) macrolides; (H) nitrofurans; (I) phenicolis; (J) polypeptides; (K) Quinolones; (L) Tetracyclines, and a red vertical line represents the overall prevalence from meta-analysis and the diagonal lines provide 95% C.I.

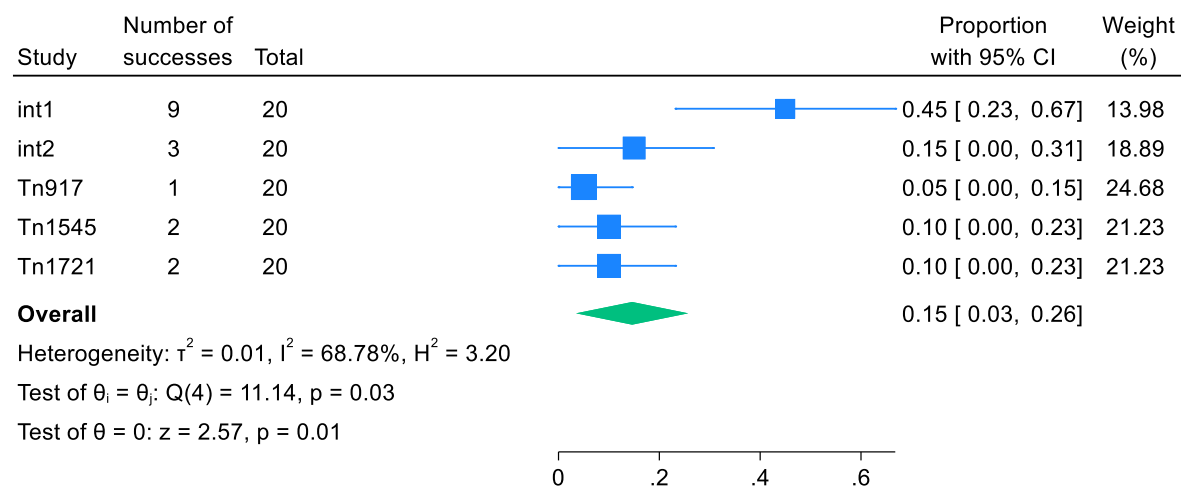

Random-effects REML model

(A)

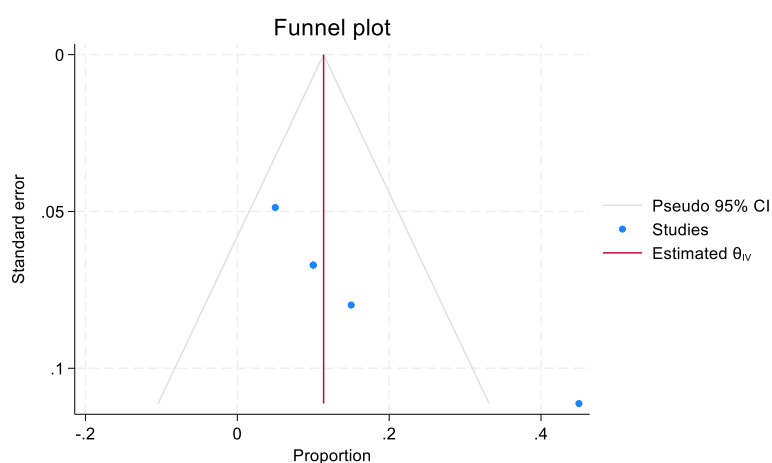

(B)

**Figure S2.** The meta-analysis of prevalence of resistance determinants from *V. parahaemolyticus* isolates in shrimp using random-effects model with a 95% C.I.; (A) a forest plot representing the results in meta-analysis with size squares proportional to the weight assigned to the study; (B) a funnel plot of occurrence of resistance determinants in *V. parahaemolyticus* to assess potential bias.
